# Supplementary material for: Assessing the Risk of Legionella Infection through Showering with Untreated Rain Cistern Water in a Tropical Environment
Source: MDPI journal article supplement (doi:10.3390/w13070889), 2021-03-24
Supplement: s1 [file s1]

**Assessing the risk of *Legionella* infection through showering with untreated rain cistern  
water in St. Thomas, Virgin Islands**

Hunter Quon<sup>1</sup>, Maura Allaire<sup>2</sup>, Sunny C. Jiang<sup>1\*</sup>

<sup>1</sup>Civil and Environmental Engineering

Henry Samueli School of Engineering

<sup>2</sup>Urban Planning and Public Policy

School of Social Ecology

University of California, Irvine

Manuscript prepared for: Journal of Environmental Management

\*Correspondence: Sunny C. Jiang, 844 Engineering Tower, University of California, Irvine, CA  
92797. Email: [sjiang@uci.edu](mailto:sjiang@uci.edu); Tel: 949-228-4495

Supplementary Information

**Table S1.** Aerosol inhalation deposition rates in the alveolar-bronchilar region of the lungs (Zhou, Benson, Irvin, Irshad, & Cheng, 2007).

| Showerhead flow rate (L/min) | Hot shower inhalation deposition rate (mg/min) |                | Cold shower inhalation deposition rate (mg/min) |                |
|------------------------------|------------------------------------------------|----------------|-------------------------------------------------|----------------|
|                              | Nasal Breathing                                | Oral Breathing | Nasal Breathing                                 | Oral Breathing |
| 5.1                          | 0.036                                          | 0.297          | 0.002                                           | 0.005          |
| 6.6                          | 0.049                                          | 0.357          | 0.003                                           | 0.008          |
| 9                            | 0.044                                          | 0.364          | 0.001                                           | 0.007          |

**Household Water Resource Survey**

**Date:** \_\_\_\_\_

**Location:** \_\_\_\_\_

**Survey Information:**

The University of California, Irvine is conducting a survey about Hurricanes Irma and Maria. Your responses will help us understand how people are coping with the disaster impacts. The study aims to find ways to improve disaster preparation and recovery efforts. All information you provide will be kept confidential. The interview will last about 30 mins. You have to be 18 or older to participate. If at any time you wish to stop the interview or not answer a specific question, this is entirely up to you. If you have any questions or concerns about the study, please contact Dr. Sunny Jiang of the University of California, Irvine at [sjiang@uci.edu](mailto:sjiang@uci.edu) or 949-824-5527.

1. After the hurricanes, do you have running water in your home?
  - Yes
  - No
  
2. After the hurricanes, where do you now get your water from for daily use (check all that apply)?
  - Tap water
  - Bottled water
  - Collect rainwater
  - Use water at neighbor's home
  - Other sources; please list: \_\_\_\_\_
  
3. If you get tap water, what do you use it for (check all that apply)?
  - Drinking without treatment
  - Drinking after boiling
  - Drinking after other treatments in my house
  - Washing hands
  - Brushing teeth
  - Washing dishes
  - Washing food that eating raw
  - Showering and bathing
  
4. Do you use bottled water for any of the following (check all that apply)?
  - Drinking
  - Brushing teeth
  - Washing dishes
  - Washing food that eating raw
  - Washing hands

5. If you use bottled water, how much do you spend?  
\$ \_\_\_\_ per week  
Do you wait in line to get bottled water? \_\_\_\_ minutes waiting in line each week
6. How many hours per day that you have running water in your tap in the past two weeks?
- Less than two hours per day
  - Less than 4 hours per day
  - Between 4 and 23 hours per day
  - 24 hours per day
7. If you use tap water for drinking or cooking, do you treat it?
- Boil water Time per day: \_\_\_\_ minutes
  - Add chlorine (or other chemical)
  - Use a water filter Cost of filter: \$ \_\_\_\_
  - Other, please list: \_\_\_\_\_
8. Do you store water?
- No
  - Yes → If yes, how do you store water:  In bathtub  In sink  In containers
9. How safe do you think your water is?
- Very unsafe (serious health risk)
  - Somewhat unsafe (some health risk)
  - Safe (no health risk)
10. Does your water look dirty or taste bad (check all that apply)?
- Looks bad
  - Tastes bad
  - Neither
11. Do you think the government has done enough to let you know the safety of the water?
- Yes
  - No
12. Do you think the government has done enough to provide you with the safe water supply?
- Yes
  - No
13. Have you heard of the advisory from the government for boiling water?
- Yes
  - No
14. Normally, what is your monthly water bill? \$ \_\_\_\_ per month

15. Please rank the issues below that you think government should address first after the events of Irma and Maria (rank 1 to 5; 1 is the most important).

- \_\_\_ Restore communication (cell phone, internet)
- \_\_\_ Restore electricity
- \_\_\_ Make sure local water is safe for people to use
- \_\_\_ Restore roads and transportation
- \_\_\_ Restore police service and security situation

**Your household**

16. How many people in your household? \_\_\_\_\_ people  
How many adults (18+ years old): \_\_\_\_\_ adults  
How many children: \_\_\_\_\_ children

17. Has anyone in your household been sick that you think might be related to food or water?

- Yes → How many days were they sick? \_\_\_\_\_ days
- No

18. What is your annual income for the entire household? (Normal income, before the hurricanes)

- less than \$10,000
- \$10,001- 25,000
- \$25,001- 40,000
- \$40,001- 60,000
- \$60,001- 80,000
- more than \$80,000

19. What is the main source of income in your household (check all that apply)?

- Food services
- Hotel services
- Business owners of service industry
- Tourist services
- Other

20. What type of income do you have?

- Wage (hourly or daily)
- Salary (fixed amount, each year)
- Own your business

21. Has anyone in your household been out of work after hurricanes without pay?

- No
- Yes → If yes: How many people are out of work? \_\_\_\_\_ people  
For how many weeks? \_\_\_\_\_ weeks  
How much income have they lost? \$ \_\_\_\_\_ per week

22. Have you completed:
- Elementary school (8th grade)
  - High school
  - College
23. Type of home you live in:
- Apartment
  - Single-family home, detached
  - Multiple family home; townhouse; condo
  - Other, please list: \_\_\_\_\_

24. Do you own or rent your home:
- Own
  - Rent
  - It's my relatives or friends' home
  - Other

25. How many times have you been affected by a hurricane (not counting the hurricanes this year)? \_\_\_\_\_ times

**Impacts of Hurricanes**

26. Were any of your motor vehicles damaged during Hurricanes Irma and Maria?
- No
  - Yes → If yes: Vehicle type:  Car     Truck     Motorcycle  
 Age of vehicle: \_\_\_\_\_ years  
 Cost to repair: \$ \_\_\_\_\_  
 Too damaged to be repaired (completely destroyed)?  No     Yes

27. Have you repaired, cleaned, or replaced items in your home?

|                                                                                                             | <b>Time</b><br>your household spent<br>cleaning & repairing<br>(days) | <b>Money</b><br>you spent to clean, repair,<br>and replace (\$) |
|-------------------------------------------------------------------------------------------------------------|-----------------------------------------------------------------------|-----------------------------------------------------------------|
| <b>TOTAL you've spent:</b>                                                                                  | <b>_____ days</b>                                                     | <b>\$ _____</b>                                                 |
| <input type="checkbox"/> Furniture<br>(Tables, chairs, sofa, beds, cabinets)                                | _____ days                                                            | \$ _____                                                        |
| <input type="checkbox"/> Appliances<br>(refrigerator, stove, dishwasher,<br>washing machine, clothes dryer) | _____ days                                                            | \$ _____                                                        |
| <input type="checkbox"/> Fans, air-conditioner, lighting, electrical<br>wiring, plumbing, septic            | _____ days                                                            | \$ _____                                                        |
| <input type="checkbox"/> Electronics: television, computer                                                  | _____ days                                                            | \$ _____                                                        |
| <input type="checkbox"/> Clothing; Kitchenware (pots, plates)                                               | _____ days                                                            | \$ _____                                                        |

- Flooring, carpet, walls, doors, windows \_\_\_\_\_ days \$ \_\_\_\_\_
- Roof; exterior or interior painting; garden \_\_\_\_\_ days \$ \_\_\_\_\_
- Other, please list: \_\_\_\_\_ \_\_\_\_\_ days \$ \_\_\_\_\_

28. What items did you need to buy or spend money on because of the disasters?

|                                                                                   | Total Spent (\$) | Time Waiting in Line |
|-----------------------------------------------------------------------------------|------------------|----------------------|
| <input type="checkbox"/> Generator                                                | \$ _____         | _____ minutes        |
| <input type="checkbox"/> Fuel for generator                                       | \$ _____         | _____ minutes        |
| <input type="checkbox"/> Batteries, Solar powered devices, lighting, flashlights  | \$ _____         | _____ minutes        |
| <input type="checkbox"/> Gas for cooking; cookstove; barbecue grill               | \$ _____         | _____ minutes        |
| <input type="checkbox"/> Food                                                     | \$ _____         | _____ minutes        |
| <input type="checkbox"/> Water filter, water treatment (chlorine, other chemical) | \$ _____         | _____ minutes        |
| <input type="checkbox"/> Container to store water                                 | \$ _____         | _____ minutes        |
| <input type="checkbox"/> Tents; other temporary dwelling                          | \$ _____         | _____ minutes        |
| <input type="checkbox"/> Other, please specify                                    |                  |                      |
| 1.....                                                                            |                  |                      |
| 2.....                                                                            |                  |                      |
| 3.....                                                                            |                  |                      |

29. Did your household receive aid (check all that apply)?

| Who provided aid:                                                                                                    | Aid received:                                                                                                                        |
|----------------------------------------------------------------------------------------------------------------------|--------------------------------------------------------------------------------------------------------------------------------------|
| <input type="checkbox"/> Government<br><i>(U.S. Government; Virgin Islands; Federal Emergency Management Agency)</i> | <input type="checkbox"/> Money: \$ _____<br><input type="checkbox"/> Loan: \$ _____<br><input type="checkbox"/> Supplies or services |
| <input type="checkbox"/> Charity or Non-profit<br><i>(Red Cross, church group, etc.)</i>                             | <input type="checkbox"/> Money: \$ _____<br><input type="checkbox"/> Loan: \$ _____<br><input type="checkbox"/> Supplies or services |
| <input type="checkbox"/> Family or friends                                                                           | <input type="checkbox"/> Money: \$ _____                                                                                             |
| <input type="checkbox"/> Neighbors; Community                                                                        | <input type="checkbox"/> Loan: \$ _____<br><input type="checkbox"/> Supplies or services                                             |
| <input type="checkbox"/> Your employer                                                                               | <input type="checkbox"/> Money: \$ _____                                                                                             |

Flood insurance

Bank

Loan: \$ \_\_\_\_\_

Supplies or services

Money received from insurance:

\$ \_\_\_\_\_

Loan: \$ \_\_\_\_\_

30. Did you evacuate from your home due to the hurricane?

No

Yes

→ If yes: How long did you leave your home? \_\_\_\_ weeks

Have you returned to your home?  No  Yes

Why did you evacuate (check all that apply)?

No electricity in home

No water in home

Crime

Home too damaged to live in

Other, please list: \_\_\_\_\_

---

Are you willing to answer 5 minutes of follow-up questions, 4 months from now? If so, please let us know how to contact you: Email: \_\_\_\_\_ Cell phone: \_\_\_\_\_.

Thank you again for participating!



If you have questions or concerns about your rights as a research participant, you can contact the UCI Institutional Review Board by phone, (949) 824-6662, by e-mail at [IRB@research.uci.edu](mailto:IRB@research.uci.edu) or at 141 Innovation, Suite 250, Irvine, CA 92697.

**What is an IRB?** An Institutional Review Board (IRB) is a committee made up of scientists and non-scientists. The IRB's role is to protect the rights and welfare of human subjects involved in research. The IRB also assures that the research complies with applicable regulations, laws, and institutional policies.
